# Supplementary material for: Defects in black zirconia responsible for solar energy harvesting
Source: Royal Society of Chemistry journal article supplement (doi:10.1039/d1tc03914h), 2021-01-01
Supplement: d1tc03914h1.pdf [file d1tc03914h1.pdf]

## Supporting Information

### Defects in black zirconia responsible for solar energy harvesting

Fugong Qi<sup>a</sup>, Zhenwen Yang<sup>a, b\*</sup>, Ying Wang<sup>a, b</sup>, Qiwen Qiu<sup>c</sup>, Huijun Li<sup>a</sup>

<sup>a</sup> Tianjin Key Laboratory of Advanced Joining Technology, School of Materials Science and Engineering, Tianjin University, Tianjin, 300072, China. E-mail: yangzw@tju.edu.cn

<sup>b</sup> Key Laboratory of Advanced Ceramics and Machining Technology, Tianjin University, Tianjin, 300072, China.

<sup>c</sup> Department of Mining and Materials Engineering, McGill University, Montréal, Québec, H3A 0C5, Canada.

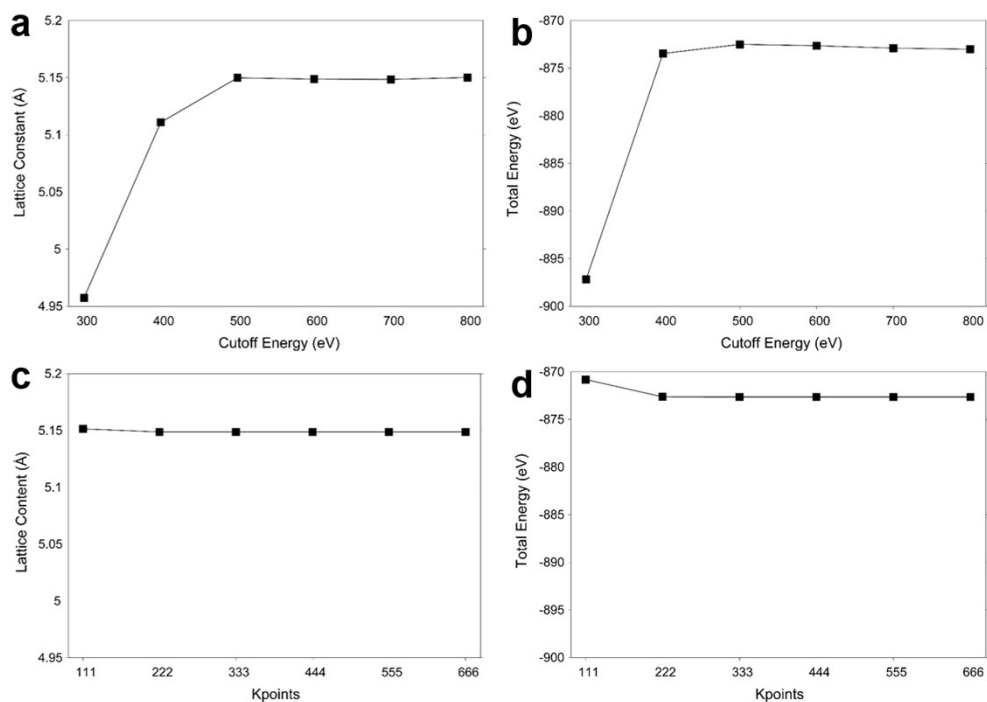

**Fig. S1** Initial tests of cutoff energy and K-point mesh for c-ZrO<sub>2</sub> model (Zr<sub>32</sub>O<sub>64</sub>).

Fig. S2a-c shows the crystal structure of black zirconia (ZrO<sub>2</sub>), which has a disordered core and well-regulated shell as reported before[1]. The difference of crystal structure between black and pristine ZrO<sub>2</sub> is observed in Fig. S2. In addition, Fig. 2a and 2b are the high magnifications of the center of Fig. S2d and the core region of Fig. S2b, respectively.

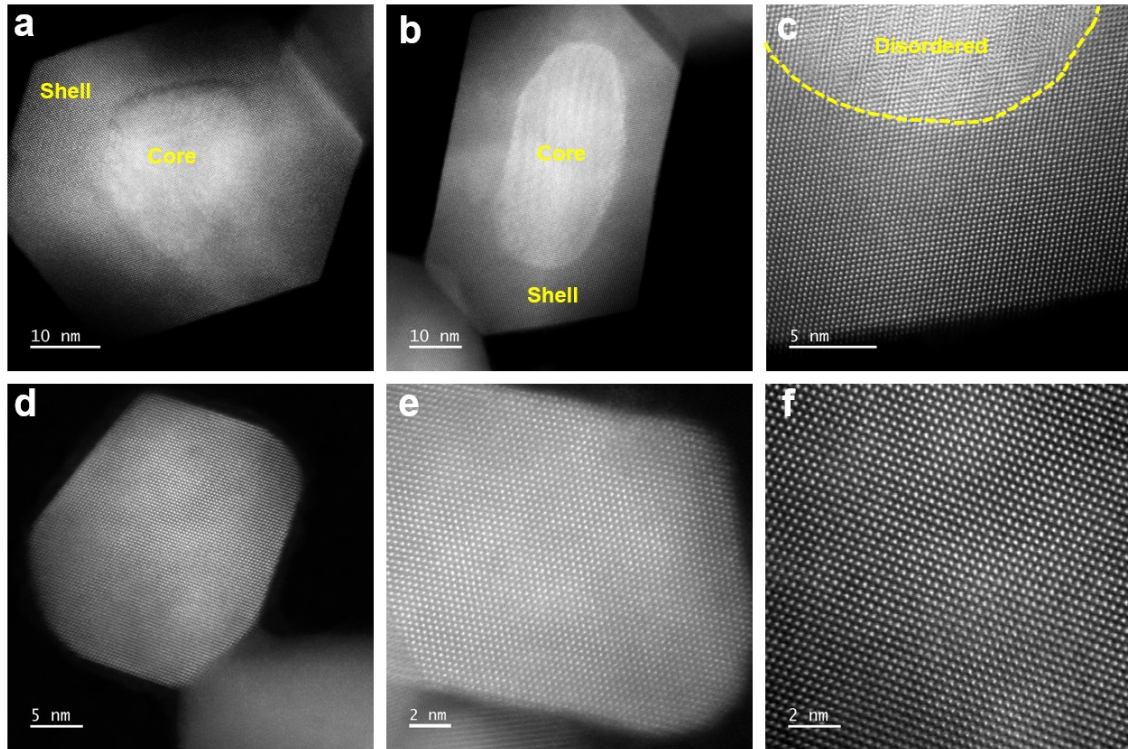

**Fig. S2** HAADF-STEM images of (a-c) black and (d-f) pristine  $\text{ZrO}_2$ .

The calculated band gap of c- $\text{ZrO}_2$  (3.9 eV) is in good agreement with the other reported calculated results[2, 3]. Although it is lower than the experimental value due to the self-interaction error of DFT[4], the DOS results are sufficient to illustrate the electronic properties difference between these defective and defect-free models. Since the color and band gap of  $\text{ZrO}_2$  does not change after  $\text{Y}_2\text{O}_3$  doping (Fig. S3), it can be inferred that the dopant of  $\text{Y}_2\text{O}_3$  and the resulting oxygen vacancies have no relationship with the darkening of  $\text{ZrO}_2$ . Thus, to unveil the secret of the darkening of  $\text{ZrO}_2$ , the  $\text{Y}_2\text{O}_3$  was not considered in the models and the c- $\text{ZrO}_2$  structure was used to simulate the pristine and black  $\text{ZrO}_2$ .

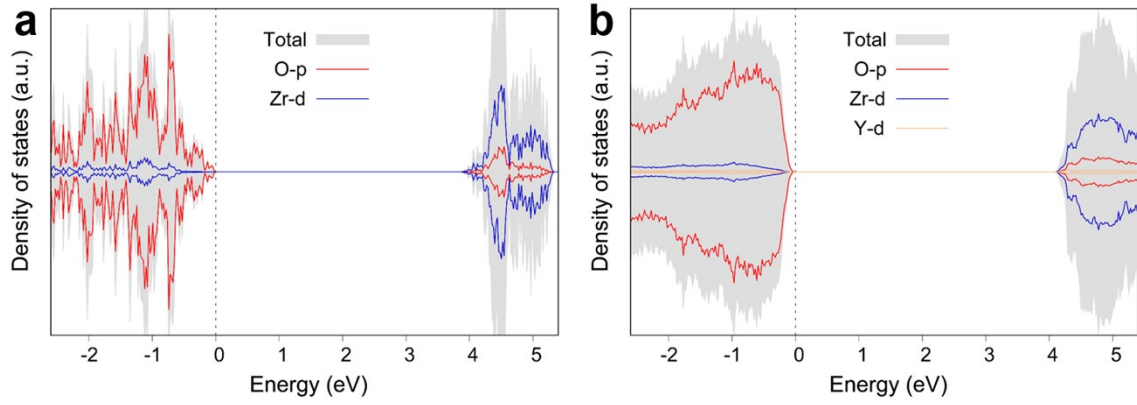

**Fig. S3** DOS of (a) the defect-free crystal structure of c-ZrO<sub>2</sub> (Zr<sub>32</sub>O<sub>64</sub>) and (b) Y<sub>2</sub>O<sub>3</sub> stabilized ZrO<sub>2</sub> (Zr<sub>8</sub>Y<sub>4</sub>O<sub>62</sub>).

To investigate the effect of the point defects distribution in ZrO<sub>2</sub> models on their lattice constant, two groups of I<sub>Zr</sub> defect model with different concentration was investigated and its lattice constants are shown in Fig. S4 (red square). It can be found that the lattice constants of the models with the same defect concentration differ very little.

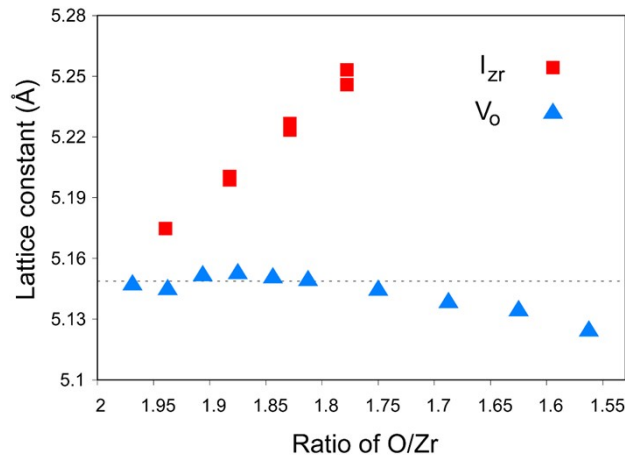

**Fig. S4** The lattice constant change of the defective models with different concentrations of I<sub>Zr</sub> and V<sub>O</sub> defect. The models with different distributions of I<sub>Zr</sub> defects were calculated, and the lattice constant difference induced by defect distribution is negligible compared to the defect concentration.

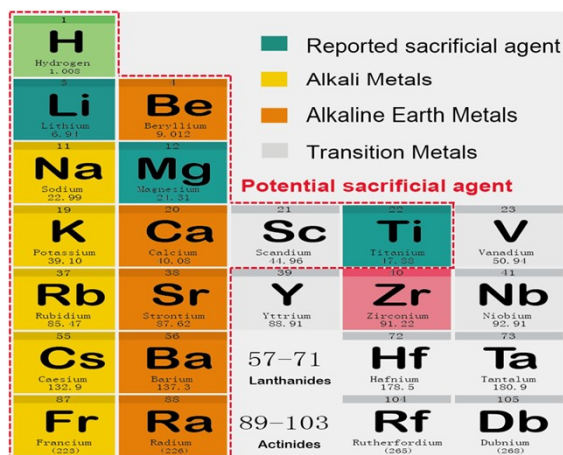

**Fig. S5** Potential sacrifice agents for synthesizing black  $ZrO_2$ .

**Table S1** Calculated Bader charge of prepared models.

| Atoms | Defect-free $ZrO_2$ |          | $I_{Zr-1}$ |          | $V_{O-16}$ |          | $V_{O-16}$ & $I_{Zr-1}$ |          |
|-------|---------------------|----------|------------|----------|------------|----------|-------------------------|----------|
|       | O                   | Zr       | O          | Zr       | O          | Zr       | O                       | Zr       |
| 1     | 7.361241            | 9.270336 | 7.370512   | 9.261482 | 7.477445   | 10.56446 | 7.467343                | 10.15891 |
| 2     | 7.365571            | 9.270336 | 7.339383   | 9.261482 | 7.441571   | 9.964929 | 7.436387                | 9.906411 |
| 3     | 7.361675            | 9.270336 | 7.339715   | 9.236227 | 7.446567   | 10.52575 | 7.41839                 | 10.12475 |
| 4     | 7.365699            | 9.270336 | 7.377587   | 9.236227 | 7.434361   | 10.0431  | 7.443392                | 9.790019 |
| 5     | 7.357281            | 9.270336 | 7.339892   | 9.236227 | 7.416276   | 9.30716  | 7.412109                | 9.423486 |
| 6     | 7.365699            | 9.270336 | 7.377587   | 9.236227 | 7.441671   | 9.72524  | 7.463237                | 9.657208 |
| 7     | 7.361993            | 9.270336 | 7.379036   | 9.455619 | 7.485072   | 9.770431 | 7.459132                | 10.33052 |
| 8     | 7.365889            | 9.270336 | 7.387351   | 9.455625 | 7.430186   | 9.66865  | 7.409264                | 10.68614 |
| 9     | 7.367861            | 9.270336 | 7.410734   | 9.261477 | 7.386523   | 9.561829 | 7.398658                | 9.621458 |
| 10    | 7.368421            | 9.270336 | 7.387352   | 9.236222 | 7.411701   | 9.880186 | 7.406547                | 9.828846 |
| 11    | 7.365022            | 9.270336 | 7.374041   | 9.261477 | 7.406674   | 9.973839 | 7.40149                 | 9.884698 |
| 12    | 7.360004            | 9.270336 | 7.411823   | 9.236222 | 7.414273   | 9.984848 | 7.407429                | 10.04943 |
| 13    | 7.363837            | 9.270336 | 7.376589   | 9.236222 | 7.463982   | 9.751983 | 7.494509                | 9.982481 |
| 14    | 7.368231            | 9.270336 | 7.411823   | 9.455619 | 7.442324   | 10.20207 | 7.431226                | 9.784784 |
| 15    | 7.368792            | 9.270336 | 7.406611   | 9.236222 | 7.41746    | 10.19338 | 7.435899                | 10.15356 |
| 16    | 7.363837            | 9.270336 | 7.377079   | 9.455619 | 7.440724   | 9.857576 | 7.439886                | 10.12704 |
| 17    | 7.365138            | 9.270331 | 7.396883   | 9.261477 | 7.475603   | 9.932892 | 7.47305                 | 9.80342  |
| 18    | 7.369289            | 9.270331 | 7.387351   | 9.236222 | 7.463893   | 9.435114 | 7.467217                | 9.801843 |
| 19    | 7.365201            | 9.270331 | 7.364687   | 9.236222 | 7.407143   | 10.1544  | 7.398853                | 10.04658 |
| 20    | 7.365635            | 9.270331 | 7.40272    | 9.455619 | 7.417912   | 10.38592 | 7.410178                | 10.40462 |
| 21    | 7.365329            | 9.270336 | 7.364687   | 9.261477 | 7.417322   | 9.760887 | 7.427529                | 9.58868  |
| 22    | 7.365889            | 9.270336 | 7.40272    | 9.236222 | 7.449726   | 9.489905 | 7.446502                | 9.690763 |
| 23    | 7.361368            | 9.270336 | 7.394889   | 9.236222 | 7.417672   | 9.665366 | 7.427479                | 9.712362 |
| 24    | 7.365826            | 9.270336 | 7.364675   | 9.455619 | 7.438829   | 9.560493 | 7.428275                | 10.53702 |
| 25    | 7.3639              | 9.270341 | 7.382701   | 9.242856 | 7.362148   | 9.834549 | 7.38273                 | 9.675069 |
| 26    | 7.364958            | 9.270341 | 7.351316   | 9.242856 | 7.445498   | 9.753975 | 7.4542                  | 9.779271 |
| 27    | 7.367924            | 9.270341 | 7.35354    | 9.242856 | 7.402506   | 9.528373 | 7.447412                | 9.553819 |

|    |          |          |          |          |          |          |          |          |
|----|----------|----------|----------|----------|----------|----------|----------|----------|
| 28 | 7.3639   | 9.270341 | 7.38744  | 9.242856 | 7.414581 | 9.705212 | 7.410098 | 9.706587 |
| 29 | 7.364027 | 9.270336 | 7.35354  | 9.242856 | 7.447264 | 9.994418 | 7.447382 | 9.829414 |
| 30 | 7.364895 | 9.270336 | 7.386691 | 9.242856 | 7.409892 | 9.859573 | 7.407542 | 9.602832 |
| 31 | 7.367797 | 9.270336 | 7.392527 | 9.242856 | 7.38983  | 9.751398 | 7.409167 | 9.924336 |
| 32 | 7.364091 | 9.270336 | 7.387351 | 9.242856 | 7.447703 | 9.529536 | 7.438187 | 9.559508 |
| 33 | 7.364768 |          | 7.361785 | 10.64587 | 7.430527 |          | 7.42431  | 10.58808 |
| 34 | 7.365699 |          | 7.395794 |          | 7.455454 |          | 7.464341 |          |
| 35 | 7.365329 |          | 7.40163  |          | 7.428841 |          | 7.418726 |          |
| 36 | 7.365699 |          | 7.387352 |          | 7.440003 |          | 7.436171 |          |
| 37 | 7.364831 |          | 7.395355 |          | 7.396863 |          | 7.407495 |          |
| 38 | 7.361929 |          | 7.364198 |          | 7.48192  |          | 7.504381 |          |
| 39 | 7.367628 |          | 7.364185 |          | 7.382537 |          | 7.394395 |          |
| 40 | 7.365826 |          | 7.40272  |          | 7.433483 |          | 7.42461  |          |
| 41 | 7.363964 |          | 7.351806 |          | 7.423269 |          | 7.42563  |          |
| 42 | 7.363964 |          | 7.386691 |          | 7.397142 |          | 7.366038 |          |
| 43 | 7.364461 |          | 7.382701 |          | 7.41479  |          | 7.386714 |          |
| 44 | 7.364027 |          | 7.351559 |          | 7.437991 |          | 7.449577 |          |
| 45 | 7.368051 |          | 7.387421 |          | 7.445881 |          | 7.453142 |          |
| 46 | 7.363964 |          | 7.387351 |          | 7.483926 |          | 7.447628 |          |
| 47 | 7.362035 |          | 7.351794 |          | 7.447584 |          | 7.459499 |          |
| 48 | 7.363964 |          | 7.393616 |          | 7.418013 |          | 7.422703 |          |
| 49 | 7.369659 |          | 7.361472 |          |          |          |          |          |
| 50 | 7.361305 |          | 7.395045 |          |          |          |          |          |
| 51 | 7.365265 |          | 7.394889 |          |          |          |          |          |
| 52 | 7.365826 |          | 7.364198 |          |          |          |          |          |
| 53 | 7.369659 |          | 7.40163  |          |          |          |          |          |
| 54 | 7.365011 |          | 7.387352 |          |          |          |          |          |
| 55 | 7.3675   |          | 7.366421 |          |          |          |          |          |
| 56 | 7.369723 |          | 7.40272  |          |          |          |          |          |
| 57 | 7.360501 |          | 7.351806 |          |          |          |          |          |
| 58 | 7.360437 |          | 7.386691 |          |          |          |          |          |
| 59 | 7.364207 |          | 7.38778  |          |          |          |          |          |
| 60 | 7.363709 |          | 7.387351 |          |          |          |          |          |
| 61 | 7.364334 |          | 7.382701 |          |          |          |          |          |
| 62 | 7.3639   |          | 7.351559 |          |          |          |          |          |
| 63 | 7.362035 |          | 7.351971 |          |          |          |          |          |
| 64 | 7.363773 |          | 7.393616 |          |          |          |          |          |

---

## Reference

- 1 F.G. Qi, Z.W. Yang, J.F. Zhang, Y. Wang, Q.W. Qiu and H.J. Li, *ACS Appl. Mater. Inter.*, 2020, 12(49), 55417-55425.
- 2 C. Imperato, M. Fantauzzi, C. Passiu, I. Rea, C. Ricca, U. Aschauer, F. Sannino, G. D'Errico, L. De

Stefano, A. Rossi and A. Aronne, *J. Phys. Chem. C*, 2019, 123(18), 11581-11590.

3 E. Albanese, A.R. Puigdollers and G. Pacchioni, *ACS Omega*, 2018, 3(5), 5301-5307.

4 I. Ciofini, C. Adamo and H. Chermette, *Chem. Phys.*, 2005, 309(1), 67-76.
